# Supplementary material for: Postcholecystectomy diarrhoea rate and predictive factors: a systematic review of the literature
Source: HighWire-hosted journal article supplement (doi:10.1136/bmjopen-2020-046172), 2022-02-01
Supplement: bmjopen-2020-046172supp001_data_supplement.pdf [file bmjopen-2020-046172supp001_data_supplement.pdf]

|                     | Representativeness of cohort | Selection of non-exposed cohort | Assessment of exposure                    | Demonstration that outcome of interest was not present at start of study | Comparability                                    | Assessment of outcome            | Follow up long enough | Adequacy of follow up                                   | Overall |
|---------------------|------------------------------|---------------------------------|-------------------------------------------|--------------------------------------------------------------------------|--------------------------------------------------|----------------------------------|-----------------------|---------------------------------------------------------|---------|
| Ros et al. 1987     | Somewhat representative*     | N/A                             | Structured interview*                     | Yes*                                                                     | No controls applied                              | Record linkage*                  | Yes*                  | Subjects lost to follow up unlikely to introduce bias * | low     |
| Heaton et al. 1993  | Somewhat representative*     | Same community*                 | Structured interview*                     | N/A                                                                      | Study controls for laparoscopic cholecystectomy* | Self report                      | Yes *                 | Complete follow up *                                    | low     |
| Wilson et al. 1993  | Somewhat representative*     | Same community*                 | Structured interview*                     | Yes*                                                                     | Study controls for laparoscopic cholecystectomy* | Record linkage* and self report  | Not for all patients  | Not adequate for all patients                           | high    |
| Fort et al. 1996    | Somewhat representative*     | Same community*                 | Surgical record and Structured interview* | Yes*                                                                     | Study controls for laparoscopic cholecystectomy* | Record linkage* and self report  | Yes *                 | Complete follow up *                                    | low     |
| Luman et al. 1996   | Truly representative*        | N/A                             | Surgical record and structured interview* | Yes *                                                                    | No controls applied                              | Record linkage* and self report  | Yes*                  | Complete follow up*                                     | low     |
| Gui et al. 1998     | Truly representative*        | N/A                             | Surgical record and structured interview* | Yes*                                                                     | No controls applied                              | Record linkage* and self report  | Yes*                  | Complete follow up*                                     | low     |
| Hearing et al. 1999 | Somewhat representative*     | Same community*                 | Surgical record and structured interview* | Yes*                                                                     | Study controls for laparoscopic cholecystectomy* | Record linkage* and self report  | Yes*                  | Subjects lost to follow up unlikely to introduce bias * | low     |
| Sauter et al. 2002  | Truly representative*        | N/A                             | Surgical record and structured interview* | Yes*                                                                     | No controls applied                              | Record linkage and self report * | No                    | Complete follow up*                                     | high    |
| Finan et al. 2006   | Truly representative*        | N/A                             | Surgical record and structured interview* | Yes*                                                                     | No controls applied                              | Record linkage* and self report  | Not for all patients  | Subjects lost to follow up unlikely to introduce bias * | high    |
| Fisher et al. 2008  | Truly representative*        | N/A                             | Surgical record and structured interview* | Yes*                                                                     | No controls applied                              | Record linkage* and self report  | Yes*                  | Complete follow up*                                     | low     |
| Mertens et al. 2009 | Truly representative*        | N/A                             | Self report*                              | Yes *                                                                    | No controls applied                              | Self report *                    | No                    | Subjects lost to follow up unlikely to introduce bias * | high    |
| Kim et al. 2014     | Somewhat representative*     | N/A                             | Surgical record*                          | Yes*                                                                     | No controls applied                              | Record linkage*                  | Not for all patients  | Complete follow up*                                     | high    |
| Yueh et al. 2014    | Somewhat representative *    | N/A                             | Surgical record and structured interview* | No                                                                       | No controls applied                              | Record linkage* and self report  | Yes*                  | Complete follow up*                                     | high    |

|                        |                           |                 |                                           |      |                                                  |                                 |      |                                                 |      |
|------------------------|---------------------------|-----------------|-------------------------------------------|------|--------------------------------------------------|---------------------------------|------|-------------------------------------------------|------|
| Lamberts et al. 2015   | Truly representative *    | N/A             | Surgical record and structured interview* | Yes* | No controls applied                              | Record linkage* and self report | No   | Subjects lost to follow up could introduce bias | high |
| Wanjura et al. 2016    | Truly representative*     | Same community* | Surgical record and structured interview* | Yes* | Study controls for laparoscopic cholecystectomy* | Record linkage* and self report | Yes* | Complete follow up*                             | low  |
| Del Grande et al. 2017 | Somewhat representative * | N/A             | Surgical record and structured interview* | Yes* | No controls applied                              | Record linkage* and self report | Yes* | Complete follow up*                             | low  |
| Manriquez et al. 2017  | Truly representative *    | N/A             | Surgical record and structured interview* | Yes* | No controls applied                              | Record linkage* and self report | Yes* | Complete follow up*                             | low  |
| Talseth et al. 2017    | Somewhat representative * | Same community* | Surgical record and structured interview* | Yes* | Study controls for laparoscopic cholecystectomy* | Record linkage* and self report | No   | Subjects lost to follow up could introduce bias | high |
| Jasim et al. 2018      | Somewhat representative * | N/A             | Surgical record and structured interview* | Yes* | No controls applied                              | Record linkage* and self report | No   | Complete follow up*                             | high |
|                        |                           |                 |                                           |      |                                                  |                                 |      |                                                 |      |

Supp. Table 1: Newcastle – Ottawa Quality assessment scale: Cohort studies

- \* = low bias

| Study               | Randomisation                                 | Allocation concealment         | Blinding         | Outcome data          | Analysis         | Follow up            | Risk of bias |
|---------------------|-----------------------------------------------|--------------------------------|------------------|-----------------------|------------------|----------------------|--------------|
| McMahon et al. 1995 | Randomisation method not adequately described | Allocation concealment unknown | Blinding unknown | Outcome data reported | ITT analysis     | Adequate follow up   | high         |
| Kim et al. 2018     | Randomization described                       | Allocation concealment unknown | Blinding unknown | Outcome data reported | Cluster analysis | Inadequate follow up | moderate     |

Supp. Table 2: Cochrane handbook assessment scale for risk of bias: R
